# Supplementary figures and images for: Genomics of a Metamorphic Timing QTL: met1 Maps to a Unique Genomic Position and Regulates Morph and Species-Specific Patterns of Brain Transcription
Source: PubMed Central journal article supplement — Genome Biol Evol. 2013 Aug 14;5(9):1716–30. doi: 10.1093/gbe/evt123 (PMC3787675; doi:10.1093/gbe/evt123), 2013-08-14

# ATP6V0C

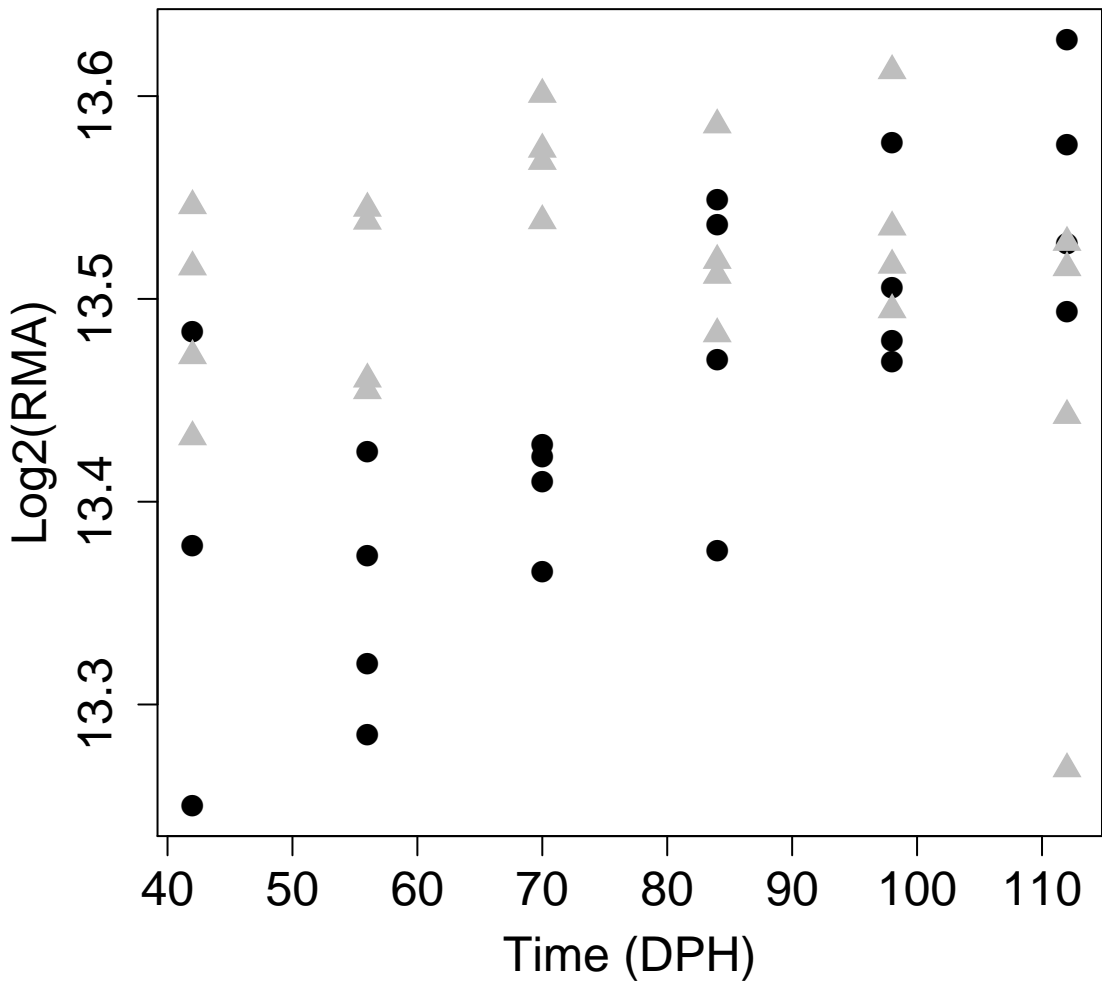

# Contig77873

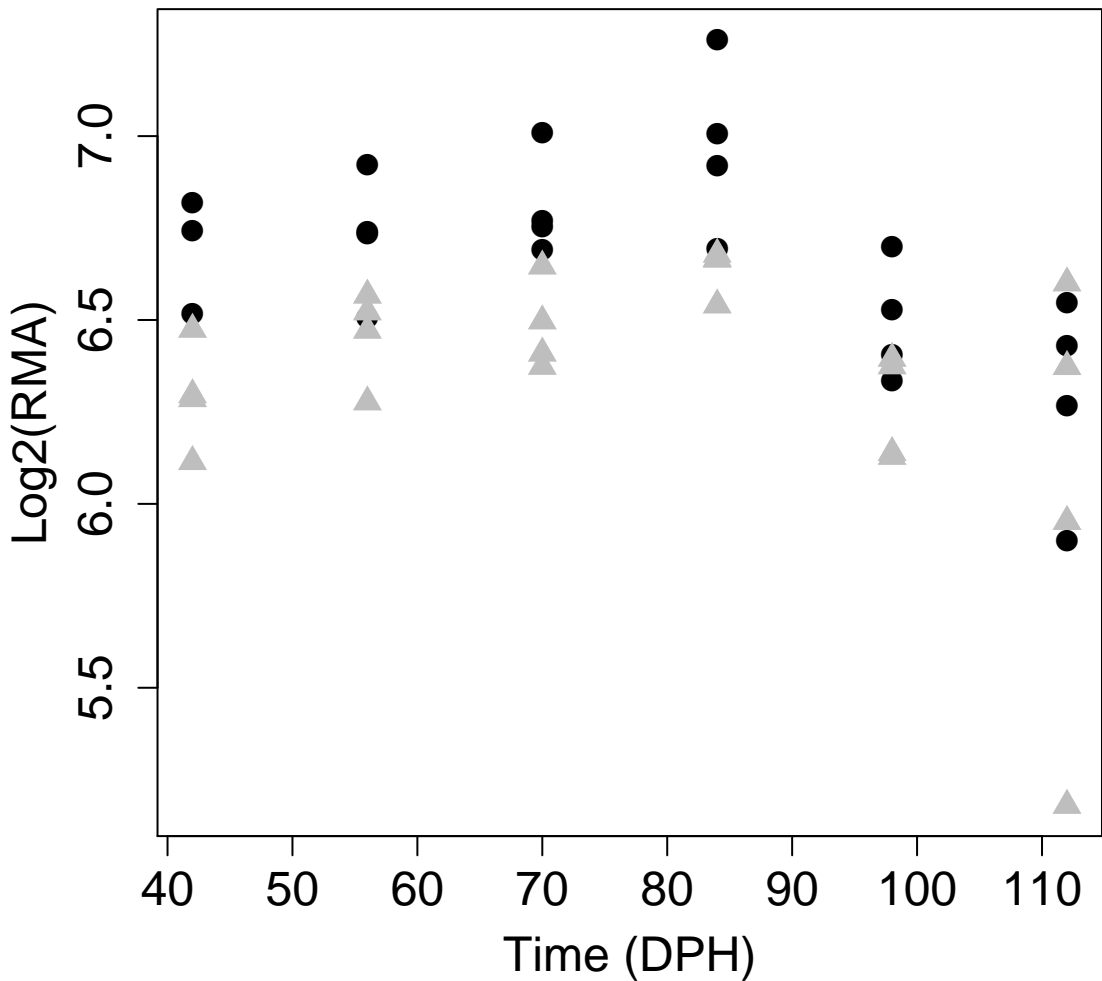

# DHCR7

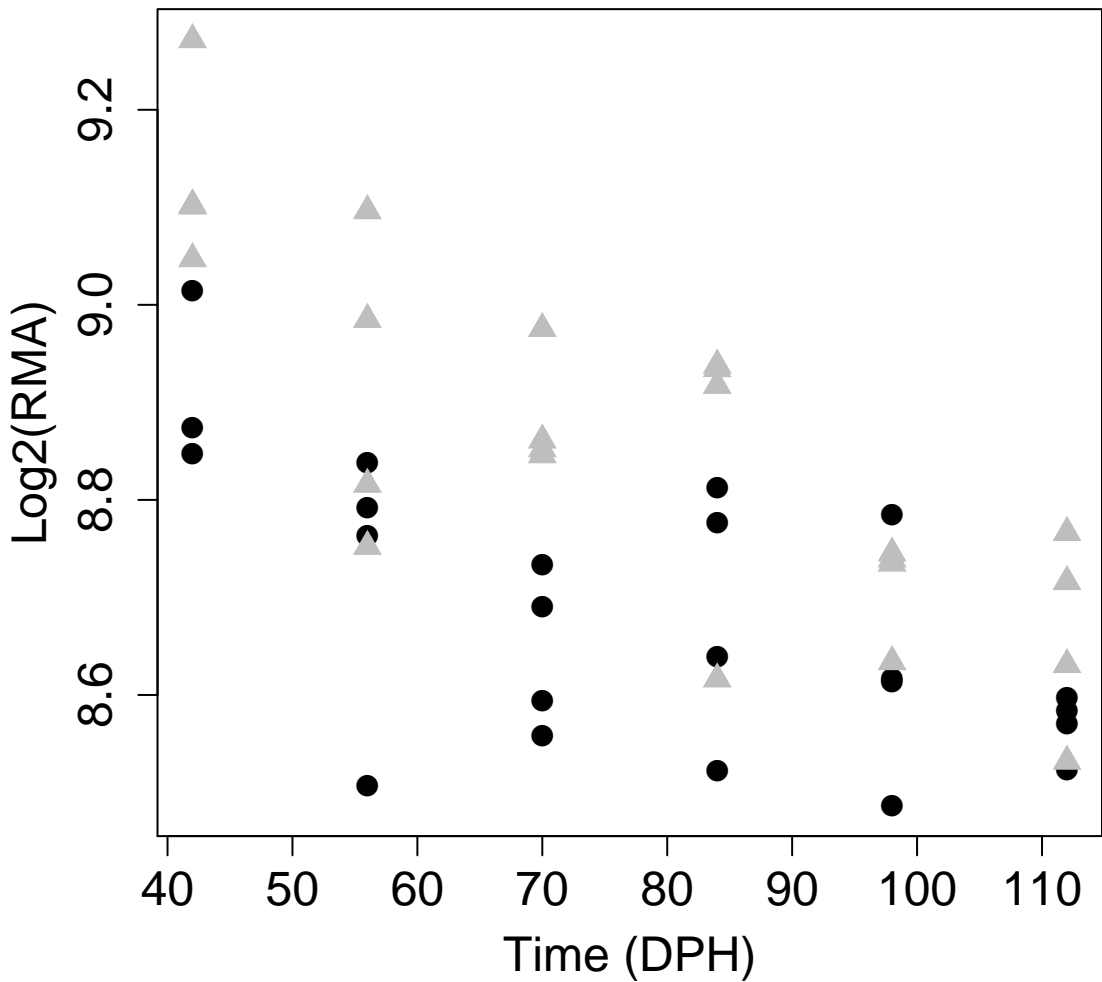

# EIF4A1

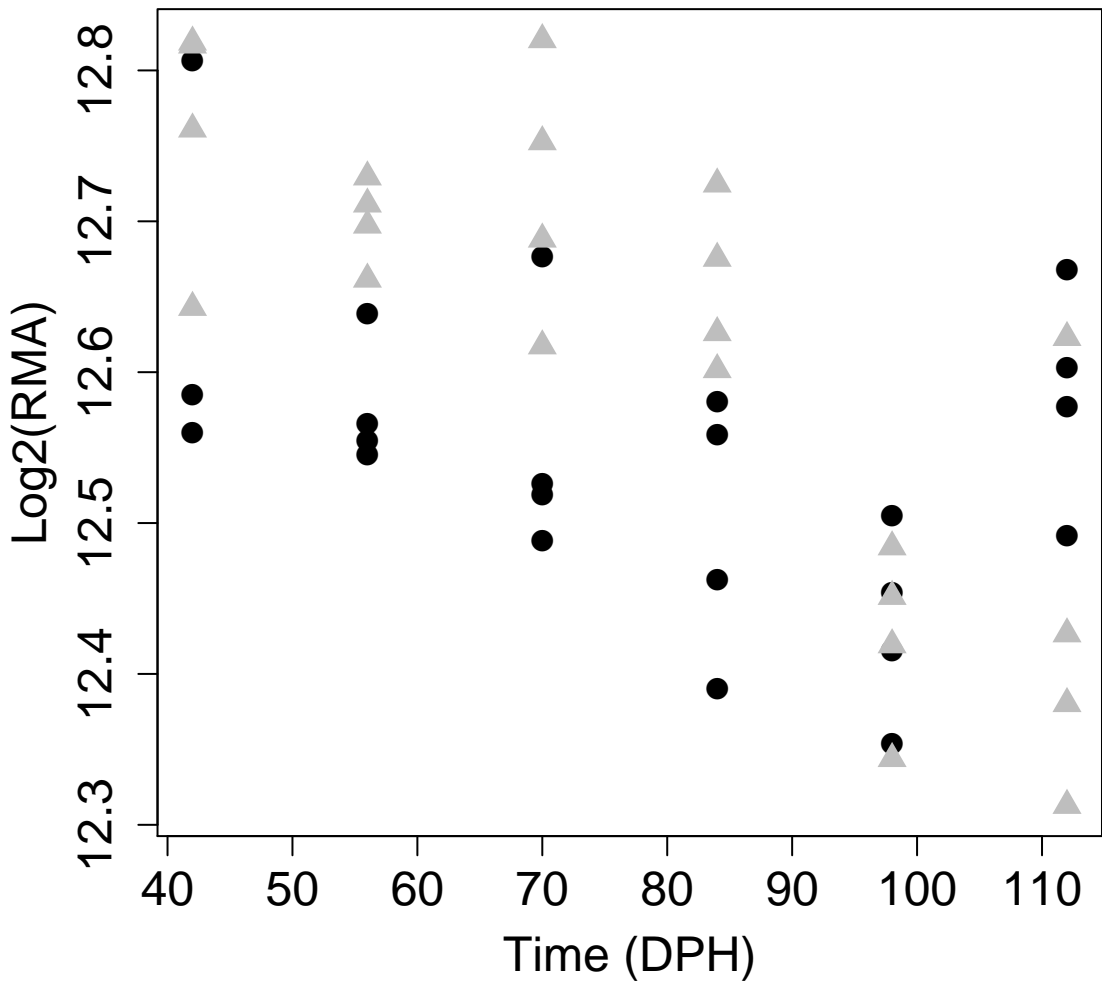

# GDI2

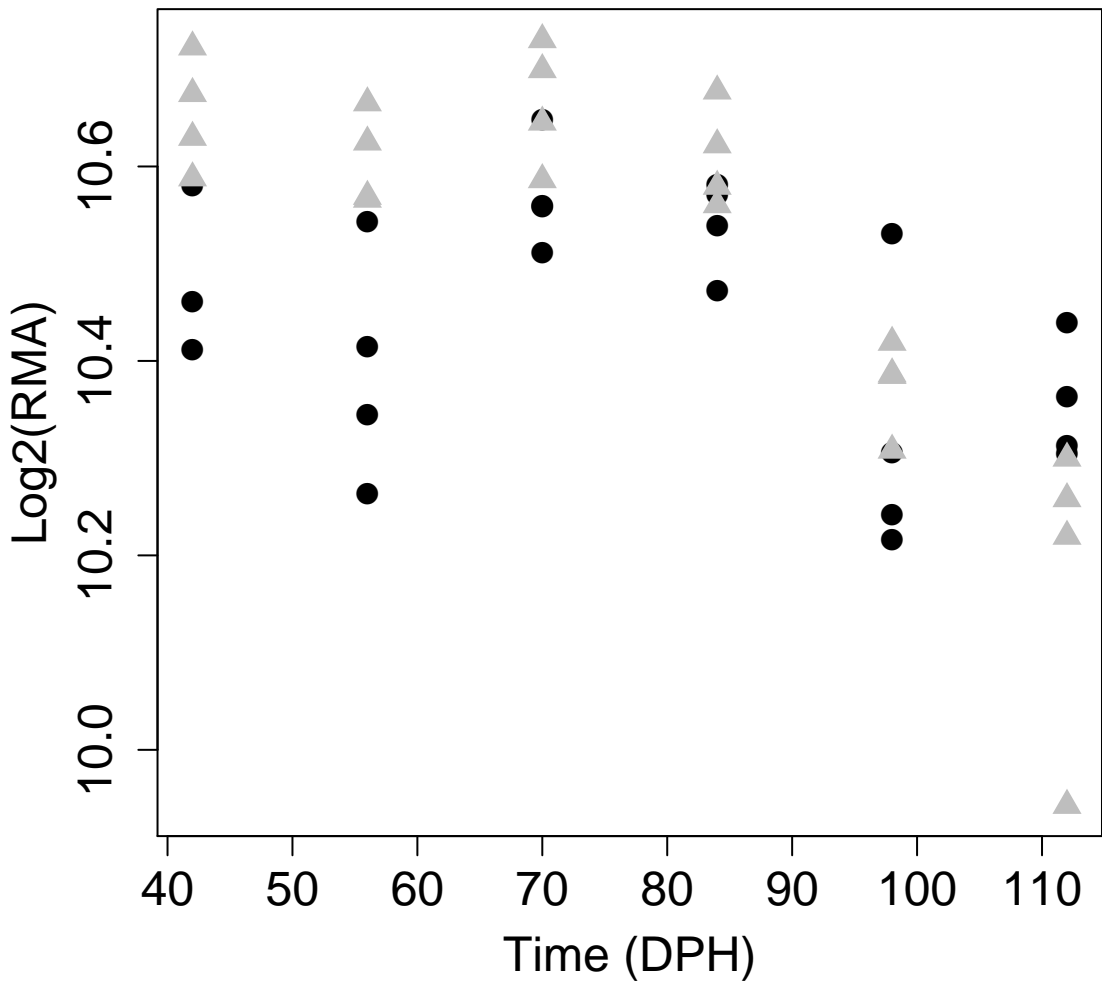

# H2AFY2

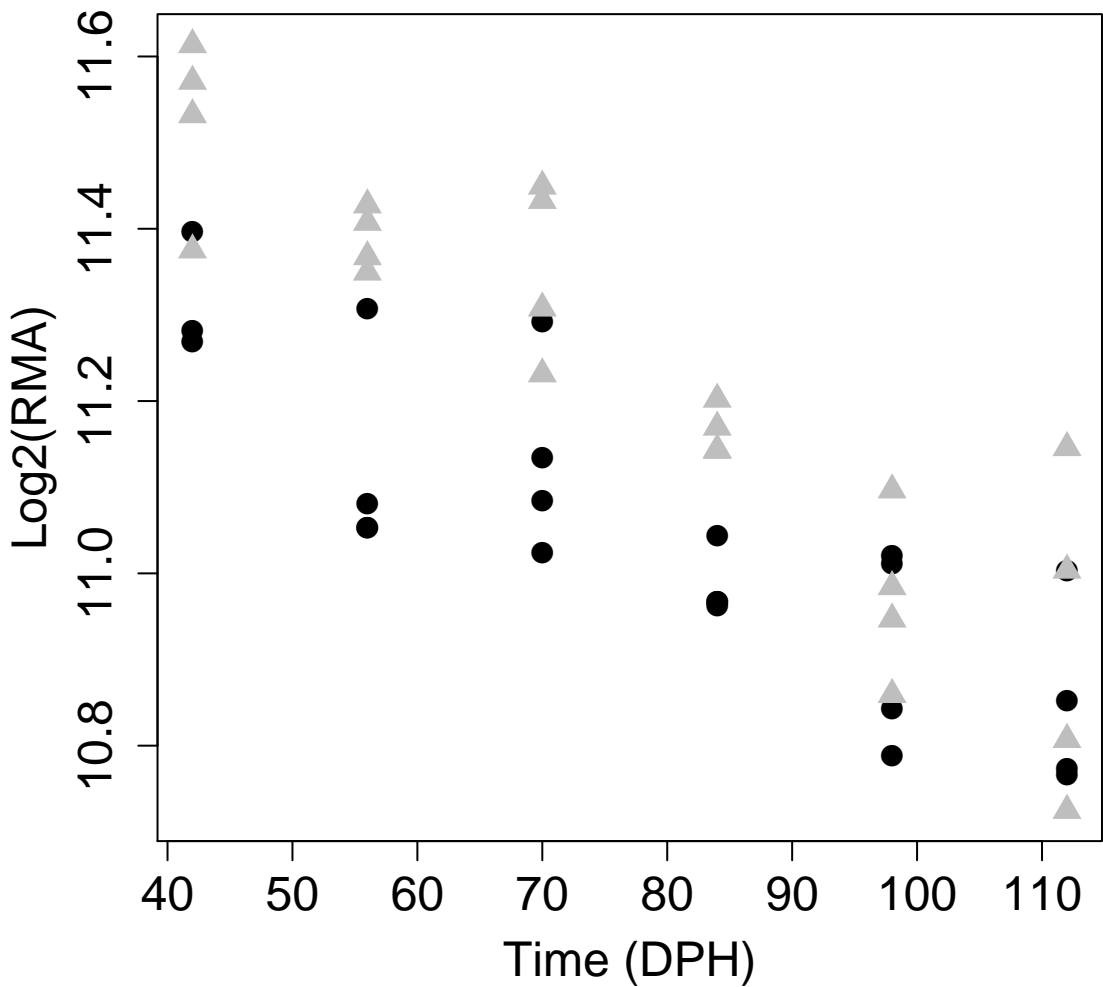



# HSP90B1

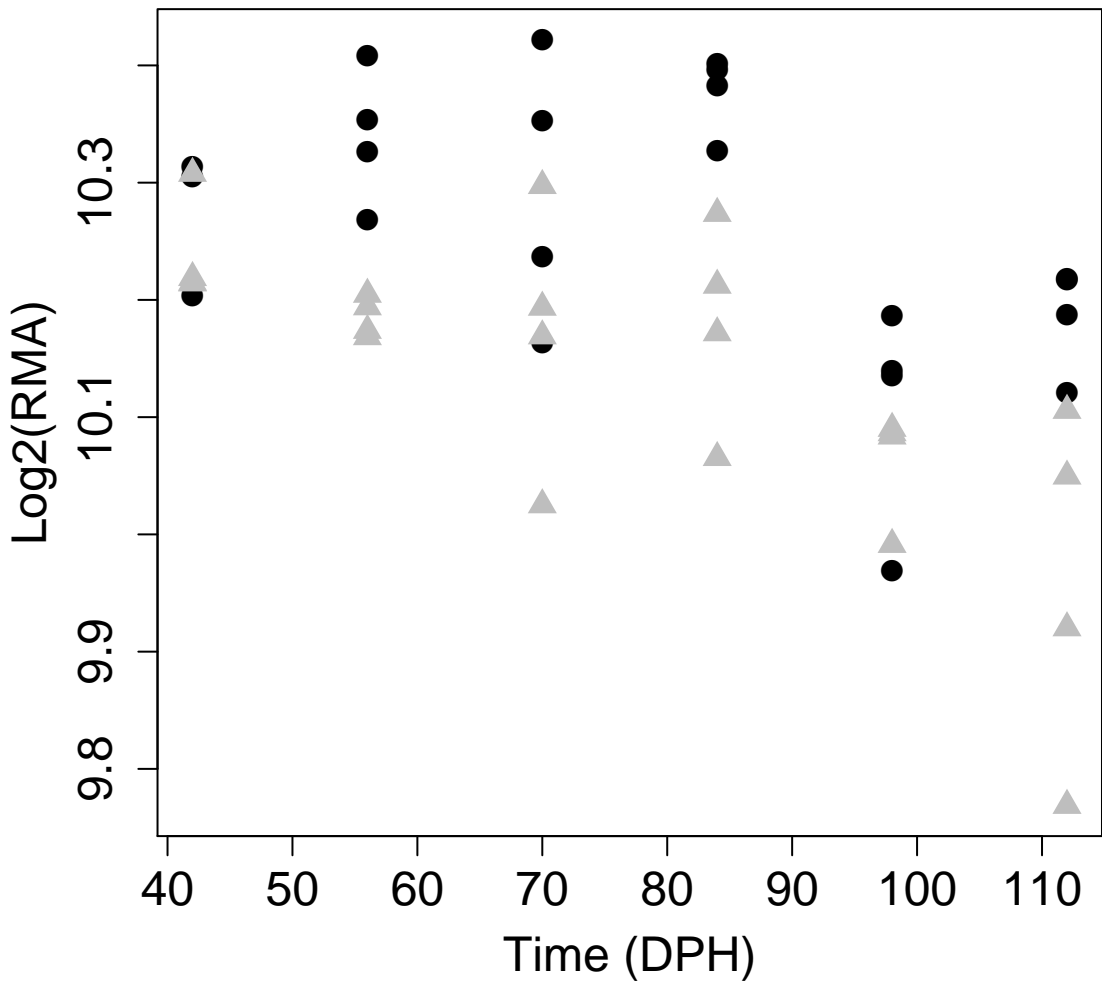



# RAC1

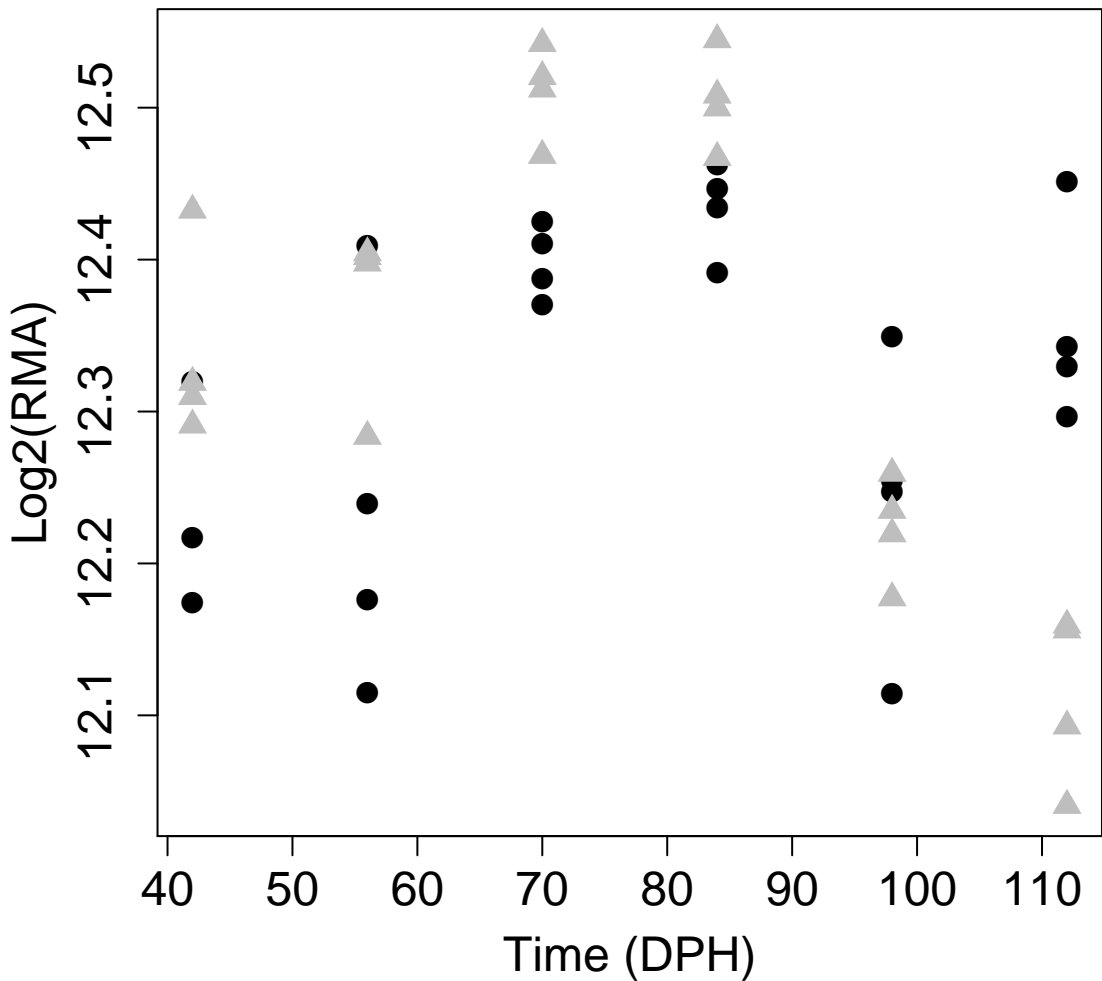

# TOMM70A

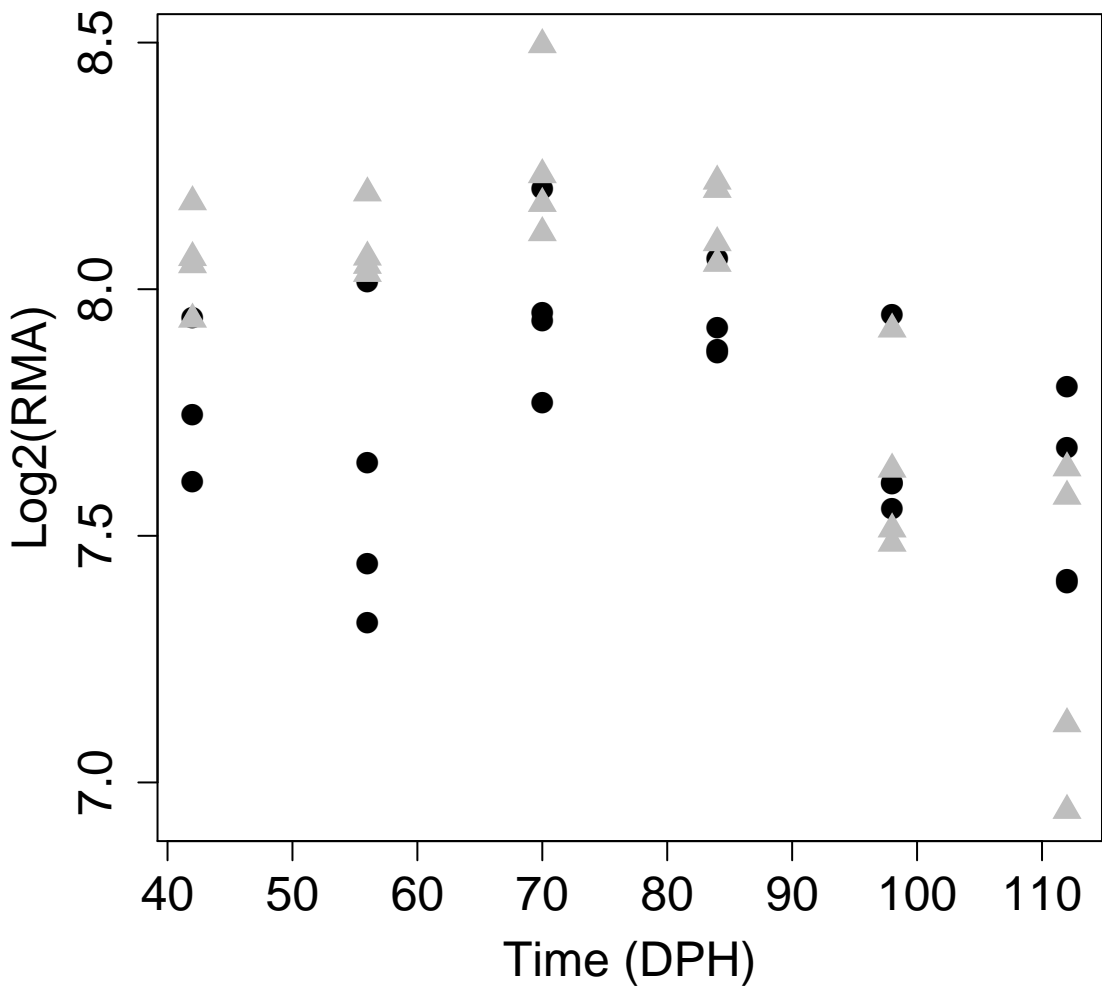

Supplement: supp_evt123_FigS1rev.pdf [file supp_evt123_FigS1rev.pdf]
